# **Tbx1 represses *Mef2c* gene expression by inducing histone 3 deacetylation of the anterior heart field enhancer**

Luna Simona Pane<sup>a,\*,@</sup>, Filomena Gabriella Fulcoli<sup>a,@</sup>, Rosa Ferrentino<sup>a</sup>, Marchesa Bilio<sup>a</sup>,  
Antonio Baldini<sup>a,b,#</sup>

a) CNR Institute of Genetics and Biophysics Adriano Buzzati Traverso, Via Pietro Castellino  
111, 80131 Napoli, Italy;

b) Dept. of Molecular Medicine and Medical Biotechnology, University of Naples Federico II.

Running Head: Tbx1, AHF enhancer, and H3 acetylation

# Address correspondence to:

Antonio Baldini,

Institute of Genetics and Biophysics of the CNR

Via Pietro Castellino 111

80131 Napoli, Italy

email: antonio.baldini@unina.it

\*Present address: Discovery Sciences, Innovative Medicines, AstraZeneca R&D Gothenburg,  
Pepparedsleden 1, SE-431 83 Mölndal, Sweden.

@ Equal contribution.

## Abstract

The *TBX1* gene is haploinsufficient in the 22q11.2 deletion syndrome (22q11.2DS), and genetic evidence from human patients and mouse models points to a major role of this gene in the pathogenesis of this syndrome. Tbx1 can activate and repress transcription and previous work has shown that one of its functions is to negatively modulate cardiomyocyte differentiation. Tbx1 occupies the anterior heart field (AHF) enhancer of the *Mef2c* gene, which encodes a key cardiac differentiation transcription factor. Here we show that increased dosage of *Tbx1* is associated with down regulation of *Mef2c* expression and reduced acetylation of its AHF enhancer in cultured mouse myoblasts. Consistently, 22q11.2DS-derived and in vitro differentiated induced pluripotent stem cells (hiPSCs) expressed higher levels of *Mef2c* and showed increased AHF acetylation, compared to hiPSCs from a healthy donor. Furthermore, we show that in mouse embryos, loss of *Tbx1* enhances the expression of the *Mef2c*-AHF-Cre transgene in a regionally restricted and dosage-dependent manner, providing an in vivo correlate of our cell culture data. These results indicate that Tbx1 regulates the *Mef2c*-AHF enhancer by inducing histone deacetylation.

## Introduction

During development, cardiac progenitors of the second heart field (SHF) are recruited or incorporated into the cardiac outflow tract and right ventricle (Kelly, 2012). During this process, cells activate a differentiation program that leads to expression of specialized proteins such as contractile proteins necessary for cardiomyocyte function. This process, still to be dissected in detail, should be tightly regulated so that a sufficient number of progenitors are allowed to proliferate and are prevented from differentiating prematurely. These two basic functions (pro-proliferative and anti-differentiative) are likely effected by a combination of signals and transcription factors, among the latters, Tbx1 is a major candidate (Baldini et al., 2017). Indeed, it is expressed in cardiac progenitors of the SHF, is shut down as they start differentiating, and it regulates positively pro-proliferative signals, and, negatively, pro-differentiative factors. Among the latters there are *Gata4* (Liao et al., 2008; Pane et al., 2012), *Mef2c* (Pane et al., 2012), SRF (Chen et al., 2009), and Smad1 (Fulcoli et al., 2009). Down regulation of Srf and Smad1 signaling are effected through non-transcriptional mechanisms, but *Mef2c* gene expression appears to be transcriptionally repressed by Tbx1.

Tbx1 regulates its target genes by interacting with the SWI-SNF-like BAF complex and with histone methyltransferases (Chen et al., 2012; Fulcoli et al., 2016; Stoller et al., 2010). However, there are a number of question marks to be answered, for example what are the co-factors that determine whether a target gene is up or down regulated. In this work, we addressed the question as to how Tbx1 represses *Mef2c* expression. We used mouse myoblast cells, transgenic mouse embryos, and differentiating human induced pluripotent stem cells (hiPSCs) from a 22q11.2DS patient and a healthy donor. Results, indicate that transcriptional

repression is associated with reduced histone 3 acetylation in the region bound by Tbx1 in cultured cells, that is the previously defined AHF enhancer of the *Mef2c* gene (Dodou et al., 2004). In addition, we show that in vivo, Tbx1 regulation of the AHF enhancer is dosage-dependent and is regionally restricted, suggesting that there are crucial interactions with other transcription factors in regulating this enhancer.

## Materials and Methods

### Generation of human induced pluripotent stem cells (hiPSCs)

Neonatal skin fibroblasts from a 22q11.2DS/DiGeorge syndrome patient were obtained from the Coriell Institute (GM07215); control skin fibroblasts were obtained from an unrelated age- and gender-matched anonymous, healthy donor.

For iPSC induction, retroviruses encoding the human *OCT3/4*, *SOX2*, *KLF4*, and *c-MYC* factors were independently produced by transfecting HEK293T cells with pMXs vectors (Addgene plasmids 17217, 17218, 17219, and 17220) and the combination of moloney gag-pol plasmid pUMVC (Addgene plasmid 8449) and VSV envelope plasmid (Addgene plasmid 8454) in DMEM containing 10% FBS using Fugene HD (Roche). Viral supernatants were harvested after 48 and 72 h, filtered through a 0.45- $\mu$ m low-protein-binding cellulose acetate filter, concentrated by a spin column (Millipore, Billerica, MA, USA), and used directly to infect twice (24 h apart)  $1.5 \times 10^5$  human primary skin fibroblasts (PSFs) in the presence of 8  $\mu$ g/ml polybrene. After 6 days, cells were seeded on mouse embryonic fibroblast (MEF) feeders at the density of  $5 \times 10^4$  cells/10-cm dish and cultured for 4 additional weeks in human ES cell medium, consisting of DMEM/F12 supplemented with 20% knockout serum replacement (KSR,

Invitrogen), 2mM L-glutamine, 0.1mM nonessential amino acids, 0.1mM  $\beta$ -mercaptoethanol, 50U/ml penicillin, 50mg/ml streptomycin and 10ng/ml human b-FGF (R&D), before hiPSC colonies were manually picked. Karyotyping of the iPSC lines was performed at the Cell Culture Facility of the Telethon Institute of Genetics and Medicine in Naples, Italy, using standard methods.

### Cardiac differentiation of hiPSCs

To generate hiPSC embryoid bodies (EBs), hiPSC colonies were dissociated into clumps using PBS containing 2.5 mg/ml trypsin (USB, Staufien, Germany), 1 mg/ml collagenase IV (Invitrogen), 20% KSR, and 1 mM  $\text{CaCl}_2$  (10 min at 37°C) and maintained for 3 days in MEF-conditioned human ES medium in low attachment plates. For spontaneous differentiation, medium was then replaced with DMEM/F12 supplemented with 20% FBS, 2 mM L-glutamine, 0.1 mM nonessential amino acids, 0.1 mM  $\beta$ -mercaptoethanol, 50 U/ml penicillin, and 50  $\mu\text{g}/\text{ml}$  streptomycin, and EBs were analyzed at day 15 for expression of marker genes of the 3 different germ layers. To improve cardiac differentiation, ascorbic acid (50  $\mu\text{g}/\text{ml}$ ) was added to the medium, and EBs were plated at day 7 on gelatin-coated dishes for better detection of beating foci.

For induction of human cardiac progenitors, hiPSCs were seeded on MEF feeders and, 1 day later, treated for 4 days with 10 ng/ml human BMP2 (R&D) and 1  $\mu\text{M}$  SU5402 FGF receptor inhibitor (Calbiochem, Darmstadt, Germany) in RPMI 1640 medium supplemented with 2 mM L-glutamine and 2% B27 supplement without vitamin A (Invitrogen), as described previously (Leschik et al., 2008; Moretti et al., 2010). Conversion of human cardiac progenitors into myocytes and vascular cells (endothelial and smooth muscle cells) was induced by

supplementing the culture medium with 50 µg/ml ascorbic acid and 10 ng/ml human VEGF (R&D System).

### Immunofluorescence and alkaline phosphatase activity assay.

hiPSCs (undifferentiated or differentiated) were fixed in 3.7% (vol/vol) formaldehyde and subjected to immunostaining by using the following primary antibodies: human Nanog (rabbit polyclonal, Abcam, 1:500), TRA1-81-Alexa-Fluor-488-conjugated (mouse monoclonal, BD Pharmingen, 1:20). Alexa-Fluor-488, -594, and -647 conjugated secondary antibodies specific to the appropriate species were used (Life Technologies, 1:500). Nuclei were detected with 1 µg/ml Hoechst 33528. Direct alkaline phosphatase activity was analyzed using the NBT/BCIP alkaline phosphatase blue substrate (Roche), according to the manufacturer's guidelines. Microscopy was performed using the imaging systems (DMI6000-AF6000), filter cubes and software from Leica microsystems. Images were pseudo-colored.

### Mouse lines and immunofluorescence

Mef2c-AHF-Cre mice (Verzi et al., 2005) were crossed with *Tbx1*<sup>+/-</sup> mice (Lindsay et al., 2001)(Lindsay et al., 2001) to obtain Mef2c-AHF-Cre;*Tbx1*<sup>+/-</sup> animals, which were then crossed with *Tbx1*<sup>flox/flox</sup> (Xu et al., 2004) or *Tbx1*<sup>+/-</sup> mice. Animal studies were carried under the auspices of the animal protocol 257/2015-PR (licensed to the AB lab) reviewed, according to Italian regulations, by the Italian Istituto Superiore di Sanità and approved by the Italian Ministero della Salute. Pregnant females at plug day (E) 9.5 were sacrificed using CO<sub>2</sub> inhalation. The laboratory applies the "3Rs" principles to minimize the use of animals and to limit or eliminate suffering.

Immunofluorescence on paraffin-embedded E9.5 embryo sections was performed using an anti Cre antibody (Novagen, 69050-3, 1:1000), and an anti Isl1 antibody (Hybridoma Bank, 39.4D5-s, 1:50).

### Quantitative reverse transcription PCR (qRT-PCR)

Total mRNA was isolated from PSF, hiPSCs, EBs, and cardiac cells using the Stratagene Absolutely RNA kit and 1µg was used to synthesize cDNA using the High-Capacity cDNA Reverse Transcription kit (Applied Biosystems). Gene expression was quantified by qRT-PCR using 1µl of the RT reaction and the Power SYBR Green PCR Master Mix (Applied Biosystems). Gene expression levels were normalized to GAPDH. A list of primers is provided in Supplementary Tab. 1.

### Cell lines, plasmids and transfections

Mouse C2C12 myoblasts (ATCC, # CRL-1772) were cultured in Dulbecco's modified Eagle's medium supplemented with 10% fetal bovine serum. For differentiation and transient transfection, cells were plated at a density of  $1.5 \times 10^5$  cells/well on a 35-mm tissue culture dish and incubated at 37°C in 5% CO<sub>2</sub>. 24 h later, the medium was replaced with a differentiation medium containing 2% horse serum (Hyclone). Transfection of 1 µg of Tbx1-3HA (Chen et al., 2012) was performed with X-tremeGENE (Roche, Penzberg, Germany) according to the manufacturer's instructions.

### Chromatin immunoprecipitation

C2C12 cells and hiPSCs were cross-linked with 1% formaldehyde for 15 min at room temperature and glycine was added to stop the reaction to a final concentration of 0.125 M for 5 min. The cell pellet was suspended in 6 x volumes of cell lysis buffer (10 mM HEPES, 60 mM KCl, 1 mM EDTA, 0.075% v/v NP40, 1 mM DTT and 1X protease inhibitors, adjusted to pH 7.6) in a 1.5 mL tube incubating on ice for 15 min. Isolated nuclei were suspended in Buffer B (LowCell ChIP Kit reagent) and chromatin was sheared into 200–500 bp long fragments using the Covaris S2 Sample Preparation System (Duty Cycle: 5%, Cycles: 5, Intensity: 3, Temperature: 4°C, Cycles per Burst: 200, Power mode: Frequency Sweeping, Cycle Time: 60 seconds, Degassing mode: Continuous). Soluble chromatin was incubated with 6µg of Anti-acetyl-Histone H3 (Millipore, #06-599), or normal rabbit/mouse IgG (Santa Cruz Biotechnology, #2027). Following steps included extensive washes and reverse crosslinking following the LowCell ChIP Kit instructions. For quantitative ChIP, we performed real-time PCR of the immunoprecipitated DNA and inputs, using the FastStart Universal SYBR Green Master kit (Roche) and the 7900HT Fast Real-Time PCR System (Applied Biosystems) using primers specific for the AHF-enhancer region of *Mef2c* (Supplementary Tab. 1).

### Statistical analysis

All data were expressed as means  $\pm$  SE from independent experiments. Differences between groups were examined for statistical analysis using a 2-tailed Student's *t* test. Values of  $P < 0.05$  were considered significant.

## **Results and Discussion**



*Increased Tbx1 expression is associated with reduced histone 3 acetylation of Mef2c AHF enhancer sequence.*

To understand the mechanisms by which Tbx1 represses *Mef2c*, we used mouse myoblast C2C12 cells undergoing muscle differentiation. We transfected a Tbx1 expression vector in these cells at day 0 and let them differentiate (Fig. 1a). The *Mef2c* gene was strongly up-regulated at day 3 of differentiation in control cells, but in *Tbx1*-transfected cells this up-regulation was strongly reduced (Fig. 1b). To exclude that this effect may be due to a delayed differentiation caused by early *Tbx1* transfection, we repeated the experiment by transfecting Tbx1 after the initiation of differentiation, at day 2, and assayed *Mef2c* expression at day 3. Also in this case we observed a strong reduction of *Mef2c* expression (Fig. 1c).

Tbx1 ChIP-seq data obtained on P19Cl6 cells (Fulcoli et al., 2016) and previously published q-ChIP data on C2C12 cells (Pane et al., 2012) revealed enrichment at the *Mef2c* anterior heart field (AHF) enhancer, as previously defined (Dodou et al., 2004) (Fig. 2a). In particular, by comparing Tbx1 ChIP-seq data on P19Cl6 cells with histone modification data during cardiac differentiation of mouse embryonic stem cells (ESCs) (Wamstad et al., 2012), we noted that the Tbx1-enriched region is relatively poor in H3K27Ac in ESCs but it progressively becomes H3K27Ac-rich during cardiac differentiation. Using available data from ENCODE, we also noted that the same region is acetylated in E14.5 in heart, where *Tbx1* is not expressed (Fig. 2a). These observations suggest that in this region H3 acetylation increases as differentiation progresses. Thus, we reasoned that Tbx1, directly or indirectly, might negatively regulate acetylation in this region. To test this possibility, we performed quantitative chromatin immunoprecipitation (q-ChIP) with an antibody against H3 acetylation (H3-Ac) in C2C12 cells. Results showed that *Tbx1* overexpression substantially reduced H3-Ac enrichment at the

*Mef2c* AHF enhancer (Fig. 2b). These results suggest that *Tbx1* contrasts *Mef2c*-AHF enhancer activity.

*Loss of Tbx1 is associated with expansion of transgenic Mef2c-AHF-Cre expression in vivo.*

To determine whether *Tbx1* represses the activity of the *Mef2c* AHF enhancer in vivo, we used the transgenic *Mef2c*-AHF-Cre line (Verzi et al., 2005), which carries the AHF enhancer that drives the expression of Cre recombinase. The activity of the enhancer was detected using immunofluorescence with an anti-Cre antibody on embryo sections. We tested *Mef2c*-AHF-Cre;*Tbx1*<sup>+/+</sup> (control) embryos and *Mef2c*-AHF-Cre;*Tbx1*<sup>fllox/-</sup> embryos (homozygous null in the *Mef2c*-AHF-Cre expression domain, and heterozygous elsewhere). We found that at E9.0 (20 somites), *Mef2c*-AHF-Cre was expressed in the core mesoderm of the 1<sup>st</sup> and 2<sup>nd</sup> pharyngeal arches (PAs), in the cardiac outflow tract (OFT), in the SHF (mostly anterior) and in a posterior-lateral cell population of the splanchnic mesoderm at the level of the cardiac inflow tract inlet, in continuity with the SHF (Fig. 3). Cre expression in the more anterior domains (PAs, OFT, and SHF) was comparable between control and mutant embryos (Fig. 3.). However, more posteriorly, Cre expression was expanded in both heterozygous and homozygous mutants, albeit more evident in the latter (Fig. 3.).

*Increased expression of MEF2C in 22q11.2DS-derived hiPSCs upon cardiac differentiation.*

To determine whether the above observations are also relevant for human cells, we have generated induced pluripotent stem cells (hiPSCs) from a 22q11.2DS patient and from an unrelated healthy donor (see cartoon in Fig. 4). hiPSC lines were characterized as shown in Figs. 5 and 6). Two hiPSC clones were differentiated into cardiac progenitors using a previously

described protocol (Leschik et al., 2008; Moretti et al., 2010). We measured *TBX1* expression and found that it peaked at day 4 of differentiation (Fig. 7a), when cells also expressed other markers of cardiac progenitors (Fig. 7b). 22q11.2DS-derived cell lines expressed a lower level of *TBX1*, as the deletion removes one copy of the gene (Fig. 7a).

We measured the expression of *MEF2C* and *GATA4*, which is another target of Tbx1 (Liao et al., 2008; Pane et al., 2012), by qRT-PCR at days 4, 8, and 12 of differentiation and found that both genes are up regulated in patient-derived cells at all differentiation points tested, compared to control cells (Fig. 8a-b).

Next, we performed q-ChIP assays on the AHF enhancer homologous region of the *MEF2C* gene and on the *GATA4* promoter. Results demonstrated that H3Ac enrichment is significantly higher in 22q11.2DS cells compared to controls for both genes (Fig. 9).

Overall, our data indicate that Tbx1 functions as a transcriptional repressor of the *Mef2c* AHF enhancer in mouse and human cells and in vivo, in mouse embryos. In embryos, we noted that the response of the enhancer is *Tbx1* dosage-dependent and is restricted to a posterior-lateral domain, indicating context-dependent regulation. The AHF enhancer integrates the actions of several critical transcription factors (Dodou et al., 2004), e.g. Isl1, Nkx2-5, Gata4, and also Tbx1. Interpreting the combinatorial code governing its regulation is of interest for the understanding of SHF development. We have previously shown that in cultured cells, Tbx1 inhibits Gata4-mediated activation of the AHF enhancer, but not Isl1-mediated activation (Pane et al., 2012). Interestingly, here we noted that the *Mef2c*-AHF-Cre expanded expression domain in mutant embryos is Isl1-negative, while most of the other *Mef2c*-AHF-Cre expression domains are Isl1-positive. In the future, it would be of interest to establish whether

Isl1 represents a "protective factor" against Tbx1-dependent suppression.

Genome-wide data obtained in P19Cl6 cells showed that, in general, chromatin regions occupied by Tbx1 are H3K27Ac-poor (Fulcoli et al., 2016). This may be because Tbx1 has an active role in histone de-acetylation or because H3K27Ac-poor regions are more likely to bind Tbx1. Future experiments will be aimed at establishing the mechanisms of interaction between Tbx1 and the histone acetylation or de-acetylation machineries.

### **Acknowledgments**

We thank Dr. Thomas Zwaka and his lab members for invaluable help in establishing methods for hiPSC generation and characterization. We acknowledge the support of the Integrated Microscopy Facility of the Institute of Genetics and Biophysics and the Cell Culture Facility of TIGEM, Pozzuoli, Italy. This work was made possible by funding from the Italian Telethon Foundation (GGP14211), from the Fondation Leducq (TNE 15CVD01), and from the MIUR/FAREBIO grant to AB.

## References

- Baldini, A., Fulcoli, F.G., Illingworth, E., 2017. Tbx1: Transcriptional and Developmental Functions. *Curr. Top. Dev. Biol.* 122, 223–243. doi:10.1016/bs.ctdb.2016.08.002
- Chen, L., Fulcoli, F.G., Ferrentino, R., Martucciello, S., Illingworth, E.A., Baldini, A., 2012. Transcriptional control in cardiac progenitors: Tbx1 interacts with the BAF chromatin remodeling complex and regulates Wnt5a. *PLoS Genet.* 8, e1002571. doi:10.1371/journal.pgen.1002571
- Chen, L., Fulcoli, F.G., Tang, S., Baldini, A., 2009. Tbx1 regulates proliferation and differentiation of multipotent heart progenitors. *Circ Res* 105, 842–51. doi:10.1161/CIRCRESAHA.109.200295
- Dodou, E., Verzi, M.P., Anderson, J.P., Xu, S.M., Black, B.L., 2004. Mef2c is a direct transcriptional target of ISL1 and GATA factors in the anterior heart field during mouse embryonic development. *Development* 131, 3931–42.
- Fulcoli, F.G., Franzese, M., Liu, X., Zhang, Z., Angelini, C., Baldini, A., 2016. Rebalancing gene haploinsufficiency in vivo by targeting chromatin. *Nat Commun* 7, 11688. doi:10.1038/ncomms11688
- Fulcoli, F.G., Huynh, T., Scambler, P.J., Baldini, A., 2009. Tbx1 regulates the BMP-Smad1 pathway in a transcription independent manner. *PLoS ONE* 4, e6049. doi:10.1371/journal.pone.0006049
- Kelly, R.G., 2012. The second heart field. *Curr. Top. Dev. Biol.* 100, 33–65. doi:10.1016/B978-0-12-387786-4.00002-6
- Leschik, J., Stefanovic, S., Brinon, B., Puceat, M., 2008. Cardiac commitment of primate embryonic stem cells. *Nat Protoc* 3, 1381–7.
- Liao, J., Aggarwal, V.S., Nowotschin, S., Bondarev, A., Lipner, S., Morrow, B.E., 2008. Identification of downstream genetic pathways of Tbx1 in the second heart field. *Dev Biol* 316, 524–37.
- Lindsay, E.A., Vitelli, F., Su, H., Morishima, M., Huynh, T., Pramparo, T., Jurecic, V., Ogunrinu, G., Sutherland, H.F., Scambler, P.J., Bradley, A., Baldini, A., 2001. Tbx1 haploinsufficiency in the DiGeorge syndrome region causes aortic arch defects in mice. *Nature* 410, 97–101.
- Moretti, A., Bellin, M., Jung, C.B., Thies, T.M., Takashima, Y., Bernshausen, A., Schiemann, M., Fischer, S., Moosmang, S., Smith, A.G., Lam, J.T., Laugwitz, K.L., 2010. Mouse and human induced pluripotent stem cells as a source for multipotent Isl1+ cardiovascular progenitors. *Faseb J* 24, 700–11.

Pane, L.S., Zhang, Z., Ferrentino, R., Huynh, T., Cutillo, L., Baldini, A., 2012. Tbx1 is a negative modulator of Mef2c. *Hum. Mol. Genet.* 21, 2485–96. doi:10.1093/hmg/dds063

Stoller, J.Z., Huang, L., Tan, C.C., Huang, F., Zhou, D.D., Yang, J., Gelb, B.D., Epstein, J.A., 2010. Ash2l interacts with Tbx1 and is required during early embryogenesis. *Exp Biol Med* Maywood 235, 569–76.

Verzi, M.P., McCulley, D.J., De Val, S., Dodou, E., Black, B.L., 2005. The right ventricle, outflow tract, and ventricular septum comprise a restricted expression domain within the secondary/anterior heart field. *Dev Biol* 287, 134–45.

Wamstad, J.A., Alexander, J.M., Truty, R.M., Shrikumar, A., Li, F., Eilertson, K.E., Ding, H., Wylie, J.N., Pico, A.R., Capra, J.A., Erwin, G., Kattman, S.J., Keller, G.M., Srivastava, D., Levine, S.S., Pollard, K.S., Holloway, A.K., Boyer, L.A., Bruneau, B.G., 2012. Dynamic and coordinated epigenetic regulation of developmental transitions in the cardiac lineage. *Cell* 151, 206–220. doi:10.1016/j.cell.2012.07.035

Xu, H., Morishima, M., Wylie, J.N., Schwartz, R.J., Bruneau, B.G., Lindsay, E.A., Baldini, A., 2004. Tbx1 has a dual role in the morphogenesis of the cardiac outflow tract. *Development* 131, 3217–27.

## Figure Legends

### Figure 1

*Tbx1* negatively regulates *Mef2c* expression in C2C12 at Day3.

Time course of *Tbx1* (a) and *Mef2c* (b) expression during in vitro C2C12 myoblast differentiation with or without transient transfection of *Tbx1*. Note that *Tbx1* negatively regulates *Mef2c* expression at day 3 of differentiation (b). (c) *Mef2c* mRNA levels are affected by *Tbx1* overexpression 24 hours after transfection (performed at day 2). Values are from 3 experiments (mean±S.D.). Asterisks indicate statistically significant difference (P-value less than 0.05). The arrows in panels a-c indicate the time of transfection (24 hours before induction of differentiation, which is on day 0).

### Figure 2

*Acetylation of Histone 3 in the AHF enhancer region of Mef2c is reduced by Tbx1 overexpression.*

(a) Examples of ChIP-seq data profiles as shown using the UCSC genome browser in the genomic region containing the AHF-Enhancer of *Mef2c* (GeneBank AY324098) (a): H3K27Ac profiles at four stages of cardiomyocyte differentiation of mouse embryonic stem cells: undifferentiated embryonic stem cells (ESC), cells expressing mesodermal markers (MES), Cardiac Precursors (CP), cardiomyocytes (CM); H3K27Ac ChIP-seq data profiles in E14.5 heart tissue; *Tbx1* ChIP-seq data profiles. Arrows indicate the primers used for real-time PCR amplification.

(b) q-ChIP assay of AcH3 on differentiating C2C12 cells (Day 3) transfected with an empty vector (EV) or with a vector over-expressing Tbx1 (Tbx1), followed by quantitative real-time PCR. Values are from 3 experiments (mean±S.D.). Asterisks indicate statistically significant difference (P-value less than 0.05).

### Figure 3

*Tbx1 regulates the Mef2c AHF enhancer in vivo.*

Immunofluorescence of transverse sections of E9.0 (20 somites) embryos with the genotype indicated, using antibodies anti Cre (green) and anti Isl1 (red). The first row (a) of sections correspond to a level immediately below the outflow tract. The second row (b) is just anteriorly to the inflow tract, while the third fourth and fifth rows (c-e) correspond to the inflow tract. Note that the Cre signals in rows a and b are comparable in the three genotypes, while in rows c and d, reduced dosage of *Tbx1* is associated with expansion of Cre expression.

### Figure 4

*Experimental design for the generation and cardiac differentiation of control and 22q11.2DS induced pluripotent stem cells (iPSCs).*

Human iPSCs were generated by overexpression of retroviral transgenes for *OCT3/4*, *SOX2* and *KLF4* in primary skin fibroblasts from a 22q11.2DS patient and from an unrelated healthy donor. Two iPSCs clones from each individual were differentiated in cardiac progenitors and analyzed by quantitative RT-PCR (qRT-PCR).

### Figure 5



### *Generation and characterization of 22q11.2DS patient-derived iPSCs.*

Images of colonies from a representative 22q11.2DS iPSC clone in bright field (a) and after staining for alkaline phosphatase (AP) activity (b). Scale bar, 500 and 200  $\mu$ m respectively. c, Karyotyping of a representative 22q11.2DS iPSC clone. d-f', Immunofluorescence analysis of pluripotency markers NANOG (d,d') and TRA1-81 (e,e') in a representative iPSC clone. DNA is stained with DAPI (f,f'). Scale bar, 200  $\mu$ m. d',e' and f' are magnification of d, e and f respectively. Scale bar, 50  $\mu$ m.

## **Figure 6**

### *Assessment of pluripotency in control and 22q11.2DS iPSCs*

a, Quantitative RT-PCR (qRT-PCR) for expression of retroviral transgenes in two iPSC clones from a control individual (CTRcl1 and CTRcl2) and two from a 22q11.2DS patient (22q11.2DScl1 and 22q11.2DScl2). Expression values are relative to the corresponding primary skin fibroblasts (PSF) infected with the four retroviruses *OCT3/4*, *SOX2* and *KLF4* (Infected primary skin fibroblasts, IPSF), normalized to *GAPDH*, and presented as mean  $\pm$  s.e.m., n=3. b, qRT-PCR analysis of endogenous genes associated with pluripotency (*c-MYC*, *KLF4*, *OCT3/4*, *SOX2*, *NANOG*, *REX1*, and *TDGF1*) in the two control (CTRcl1 and CTRcl2) and two 22q11.2DS iPSC clones (22q11.2DScl1 and 22q11.2DScl2). Expression values are relative to corresponding PSF, normalized to *GAPDH*, and presented as mean  $\pm$  s.e.m., n=3. c, qRT-PCR analysis of markers of the three germ layers, endoderm (*PDX1*, *SOX7*, and *AFP*), mesoderm (*CD31*, *DES*, *ACTA2*, *SCL*, *MYL2*, and *CDH5*), and ectoderm (*KRT14*, *NCAM1*, *TH*, and *GABRR2*) in embryoid bodies (EBs) at day 21 of differentiation from the two control (CTRcl1 and CTRcl2 EBs) and two 22q11.2DS iPSC clones (22q11.2DScl1 and 22q11.2DScl2 EBs). Expression values are relative to the corresponding undifferentiated iPSC clones, normalized to *GAPDH*, and presented as mean  $\pm$  s.e.m., n=3.

## **Figure 7**

### *Analysis of *TBX1* expression in control and 22q11.2DS iPSC-derived cardiac cells.*

a, Quantitative RT-PCR (qRT-PCR) -based TBX1 expression profile in two iPSC clones from a control individual and two from a 22q11.2DS patient during cardiac differentiation.. b, qRT-PCR-based comparison of TBX1 expression in the two control and two 22q11.2DS iPSC clones after 4 days BMP2/FGFR-inhibitor treatment (Day4). n=3,\*P<0.05 Vs. Day 0.

## Figure 8

*Analysis of MEF2C and GATA4 expression in control and 22q11.2DS iPSC-derived cardiac cells.*

Quantitative RT-PCR (qRT-PCR) -based MEF2C (a) and GATA4 (b) expression in two iPSC clones from a control individual and two from a 22q11.2DS patient at Day4, Day8 and Day12 of cardiac differentiation. n=3,\*P<0.05 Vs. Day 0.

## Figure 9

*Acetylation of Histone 3 in MEF2C and GATA4 loci is enhanced in differentiating 22q11.2DS iPS cells.*

(a,b) Localization of primer pairs (arrows) used for ChIP experiments with human cells on *MEF2C* and *GATA4* genes. "AHF enhancer" indicates a region of high similarity with the murine AHF enhancer. For reference, we report ENCODE ChIP-seq data for H3K27Ac for two cell types, undifferentiated human embryonic stem cells (H1-hESC) and human skeletal muscle myoblasts (HSMM). The GATA4 promoter region is not acetylated in these two cell types.

(c) ChIP assays with an antibody anti-AcH3 in differentiating control and 22q11.2DSiPS cells followed by quantitative real-time PCR.

## **Supplementary Table 1**

Sequence of oligonucleotides used in this study

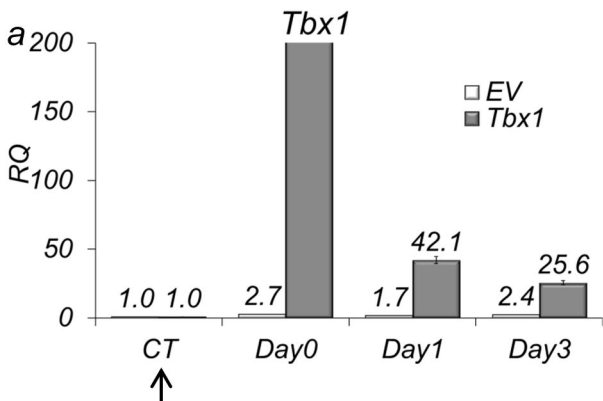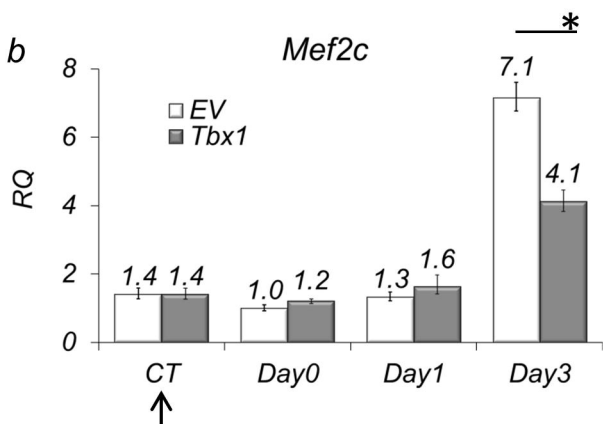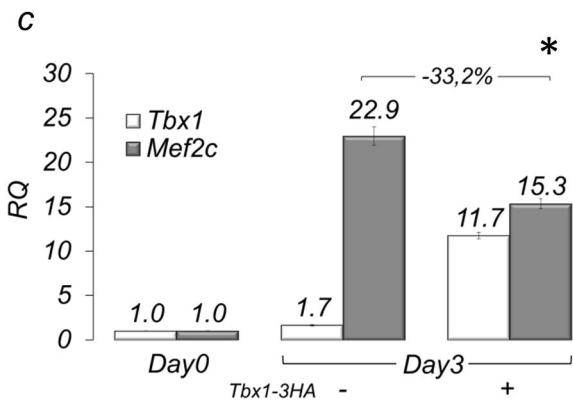

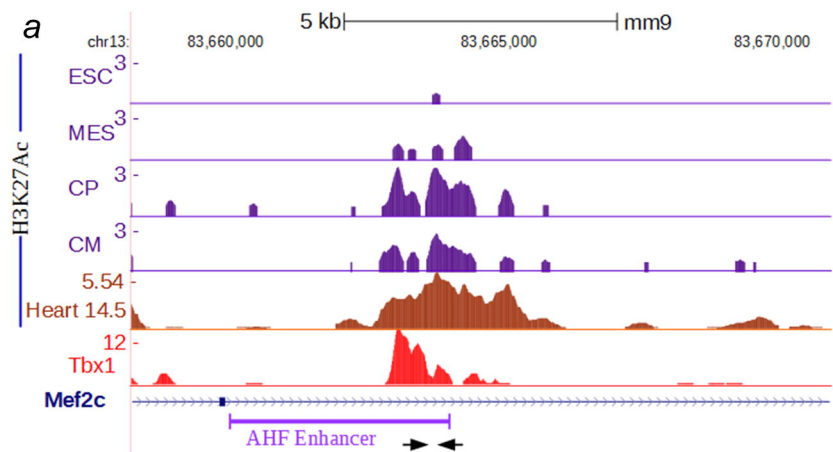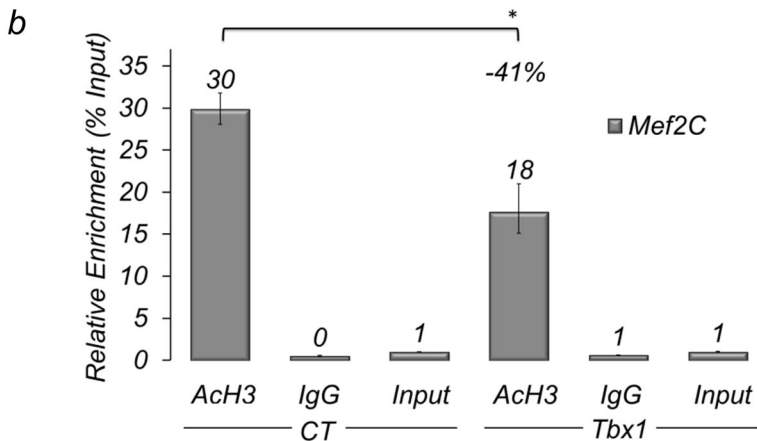



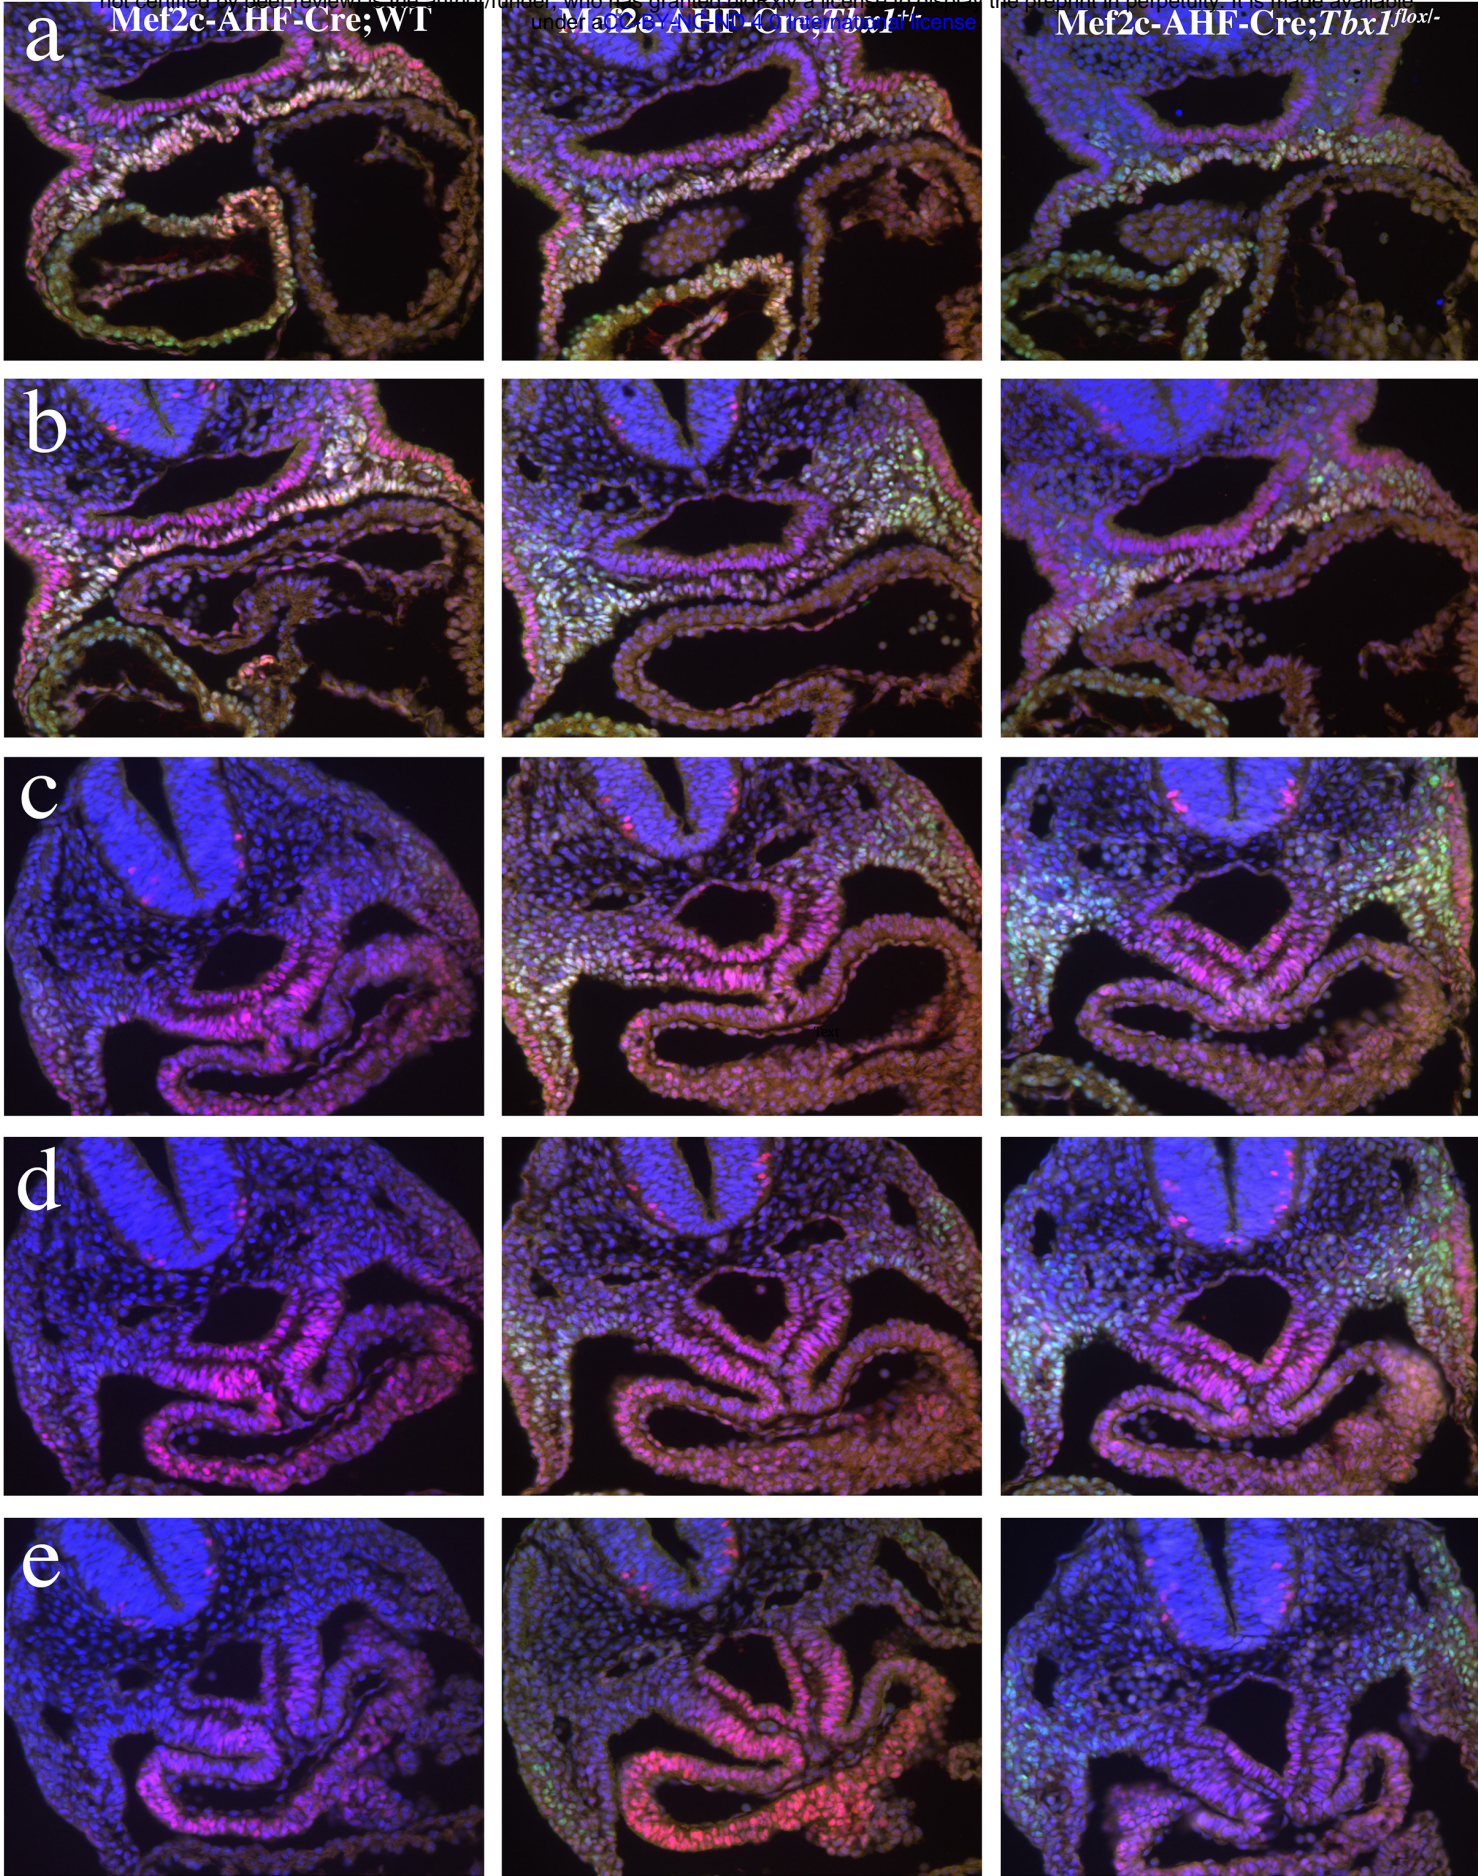



*DGS patient*

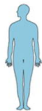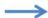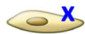

*skin fibroblasts*

*Healthy control*

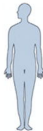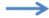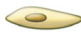

*skin fibroblasts*

*Reprogramming*

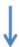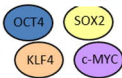

*Ectopic expression  
by retroviral transduction*

*DGS  
iPS cells*

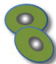

*Control  
iPS cells*

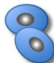

*4 days*

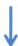

*B27+BMP2+  
FGFR inhibitor*

*DGS cardiac  
progenitors*

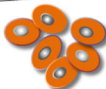

*Control cardiac  
progenitors*

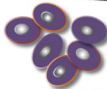

*qRT-PCR  
analysis*

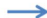

*8 days*

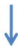

*B27+VEGF+  
Ascorbic acid*

*DGS cardiac  
differentiated cells*

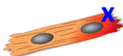

*Control cardiac  
differentiated cells*

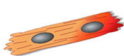

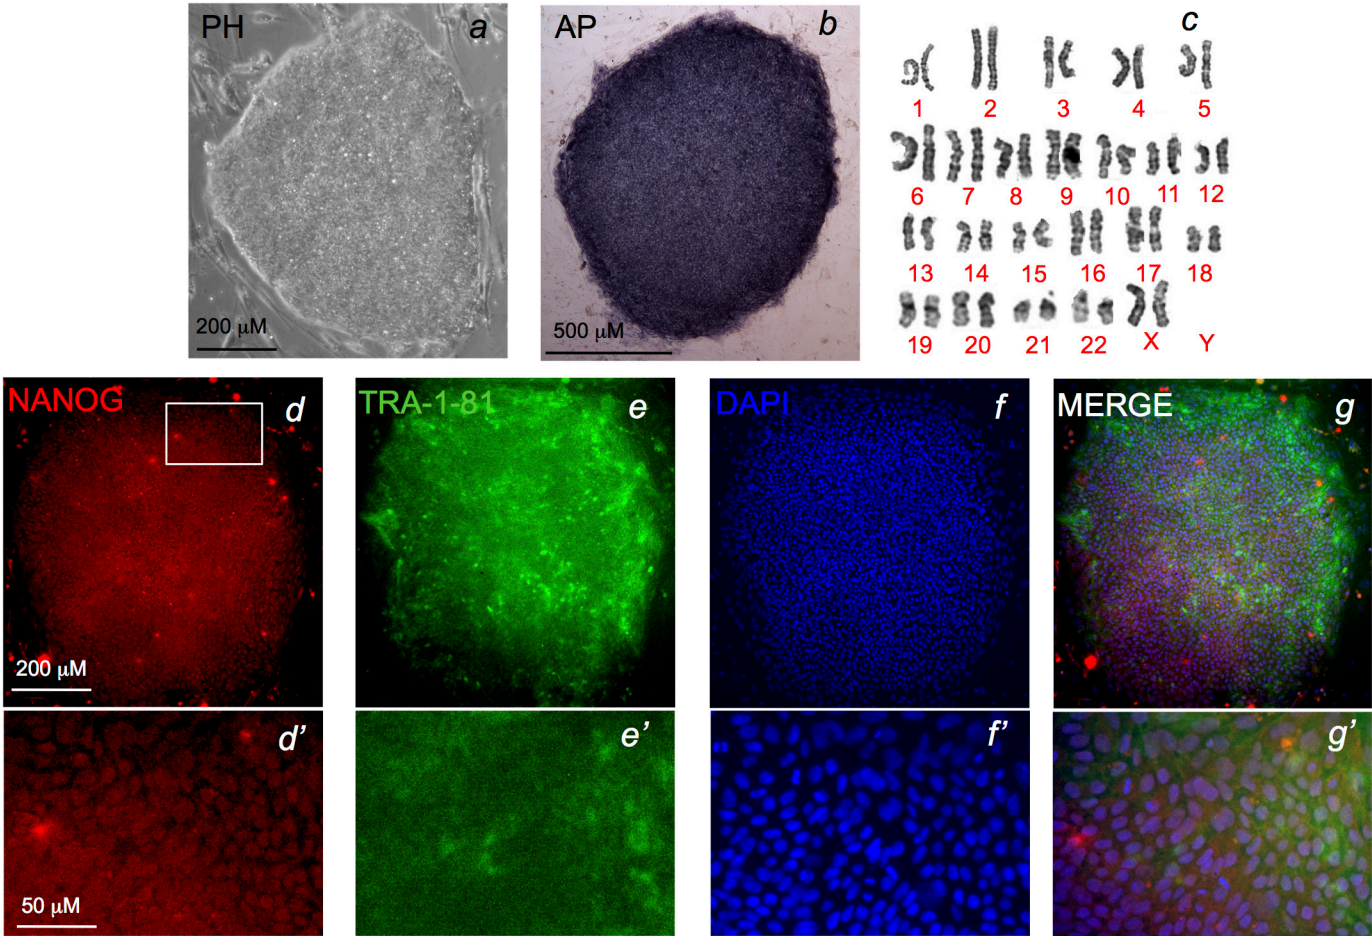



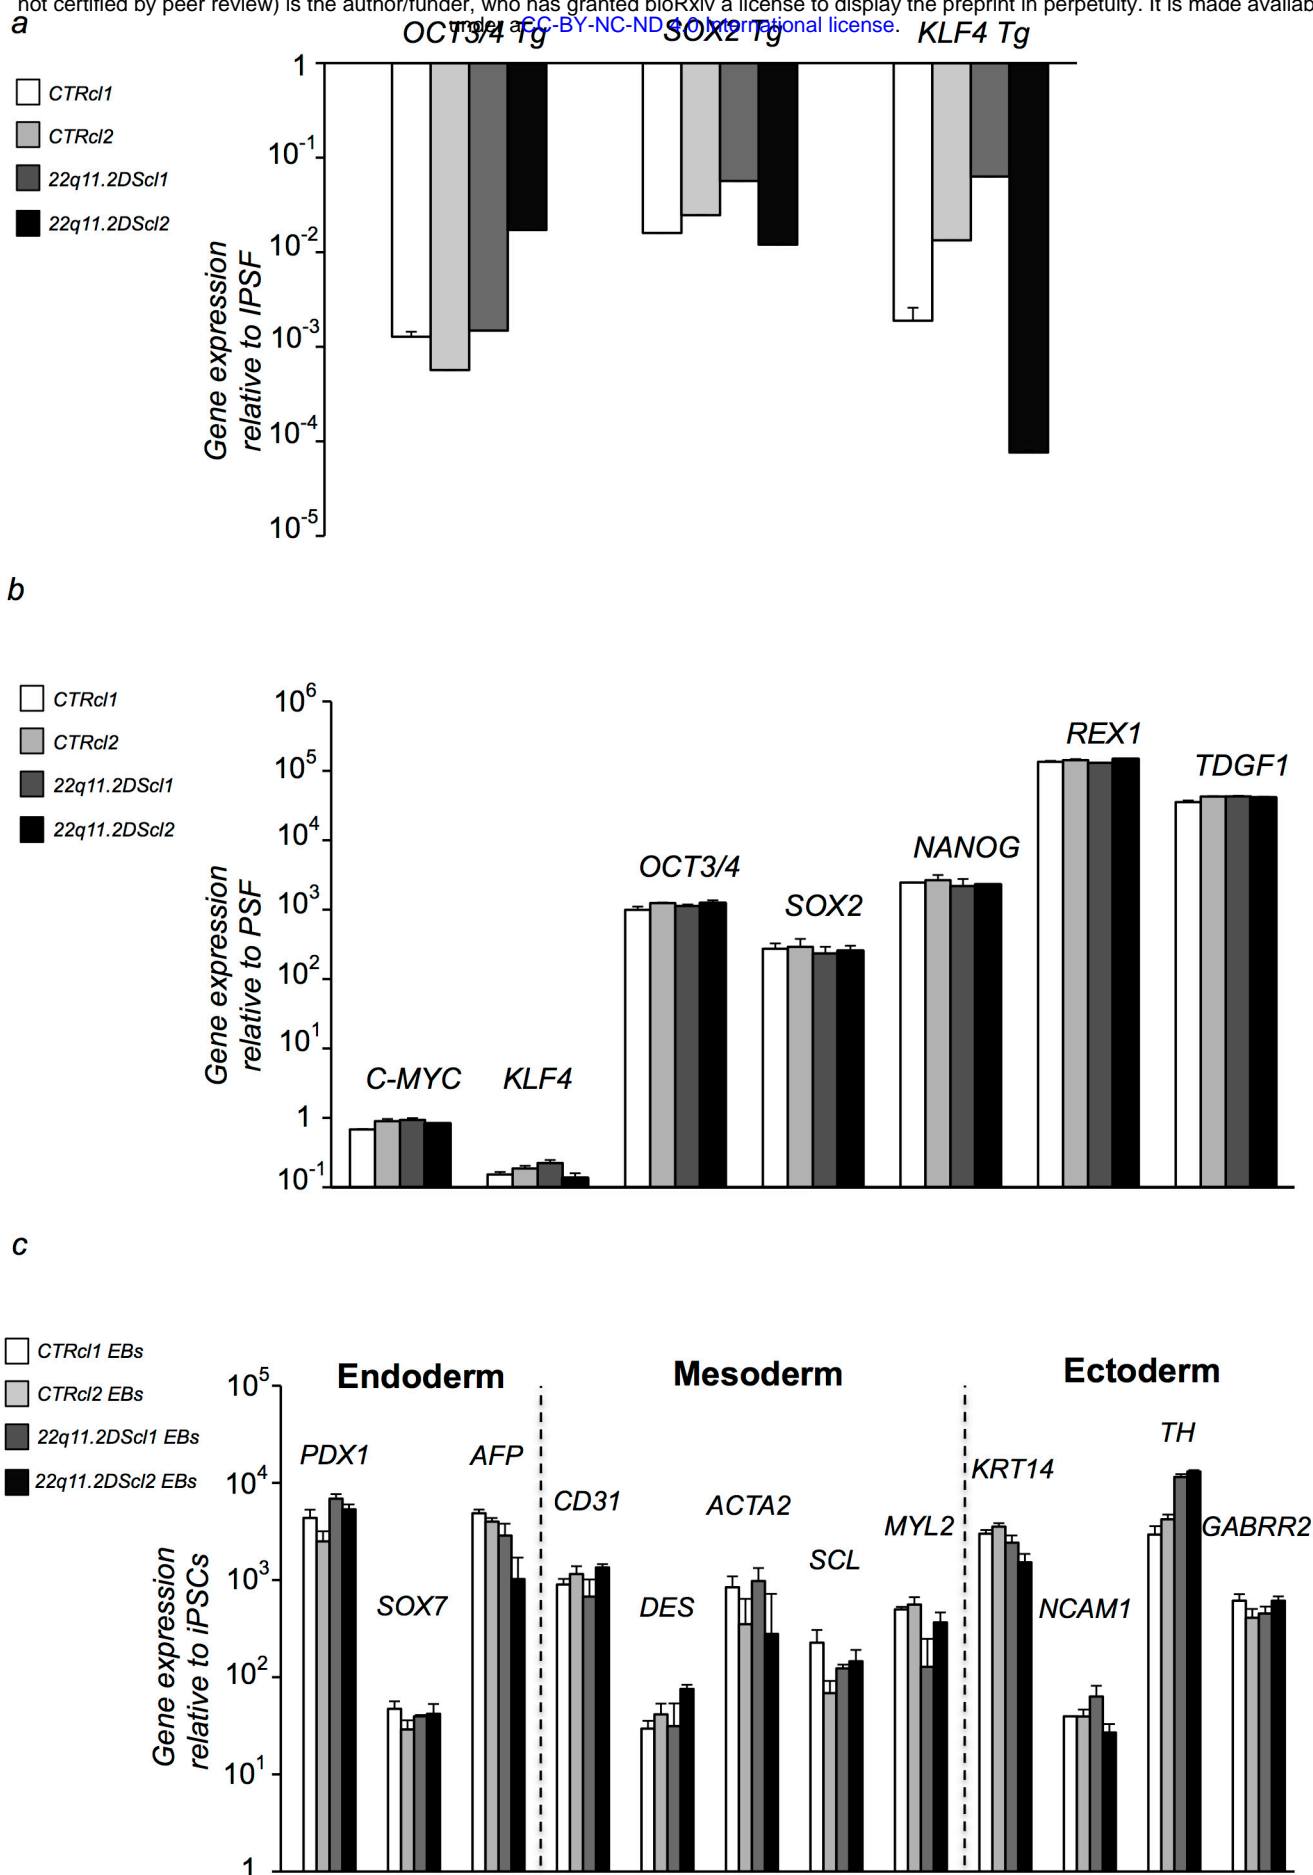

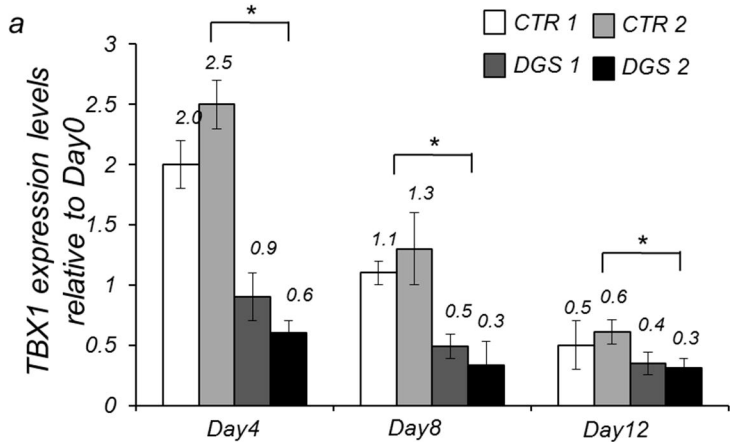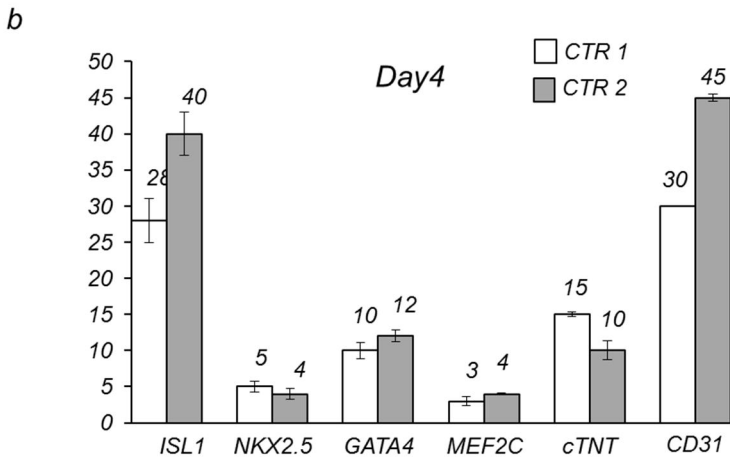

a

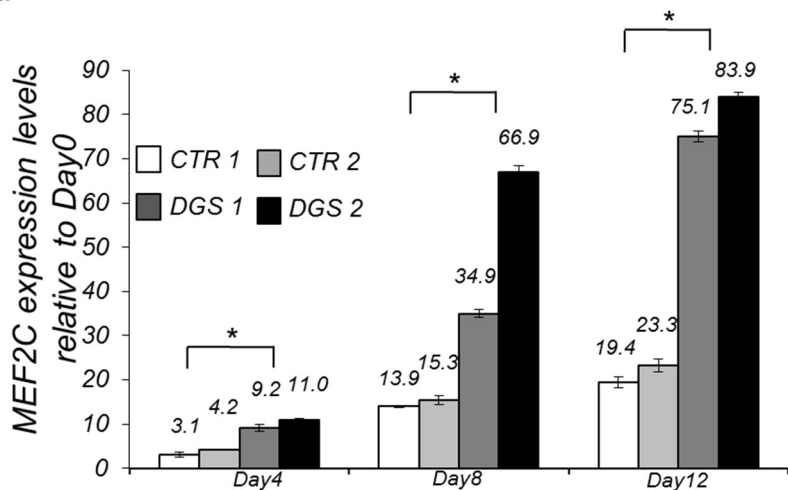

b

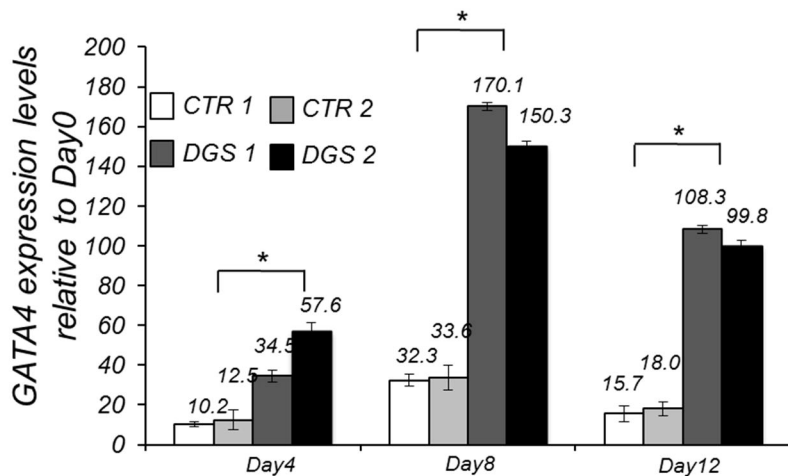

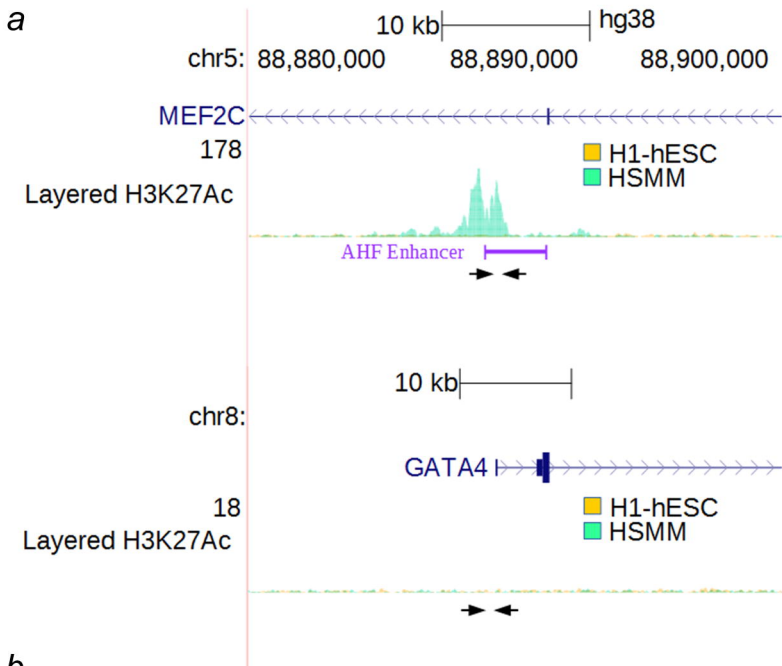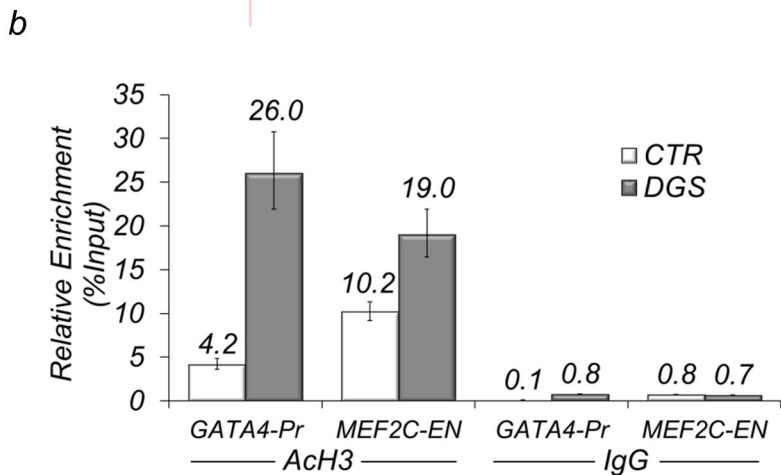

Source: http://biorxiv.org/content/10.1101/112144v1.full.pdf
